# Supplementary material for: Nanocarrier anticancer drug-conjugates cause higher cellular deformations: culpable for mischief
Source: Royal Society of Chemistry journal article supplement (doi:10.1039/d0bm00923g), 2020-01-01
Supplement: d0bm00923g1.pdf [file d0bm00923g1.pdf]

## Supporting Information

### Nanocarrier Anticancer Drug-Conjugates Cause Higher Cellular Deformations: Culpable of Mischief

Narendra Kale, Semonti Nandi, Ashwini Patil, Yuvraj Patil, Shashwat Banerjee,\* Jayant Khandare\*

#### Content

1. Cellular uptake of Dox conjugates with HeLa cells
2. Cellular morphological alterations due to CNT

#### 1. Cellular uptake of Dox nanocarriers studied on HeLa cells.

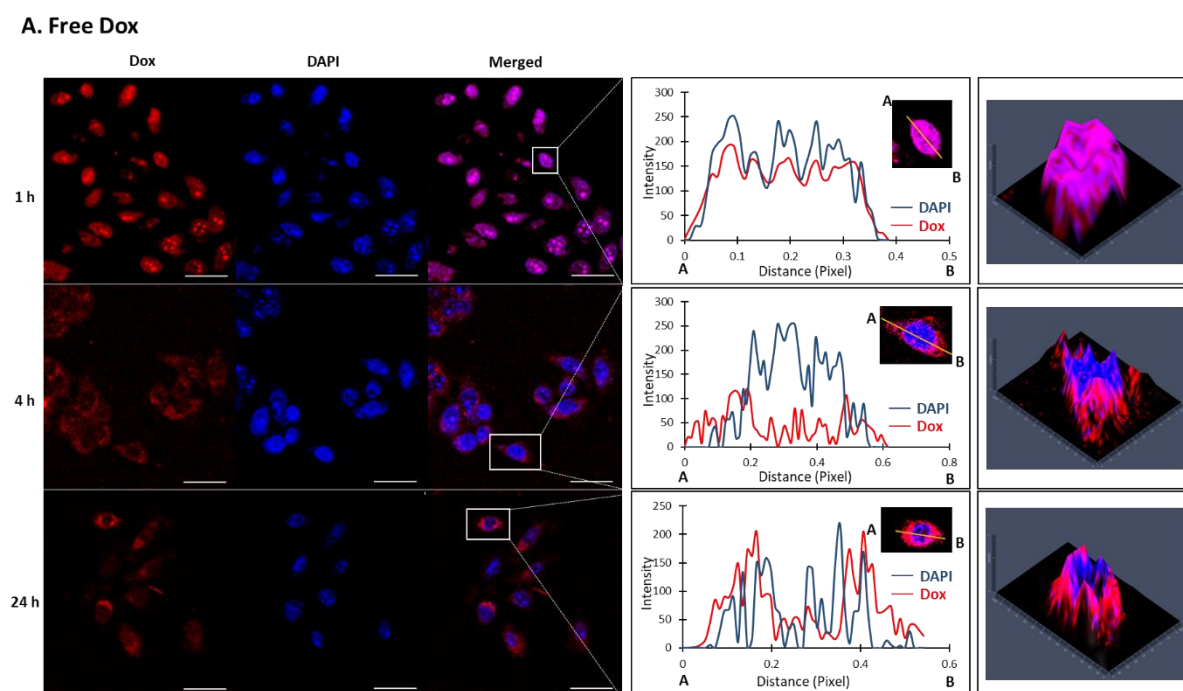

**B. CNT-Dox**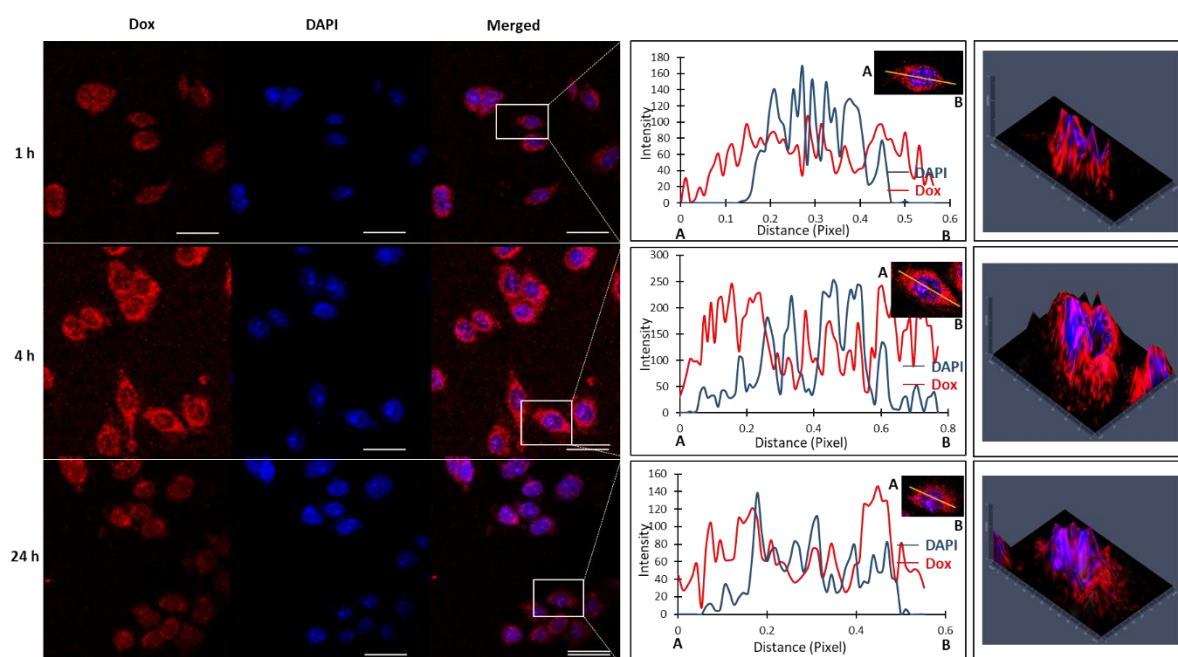**C. CNT-Cys-Fe<sub>3</sub>O<sub>4</sub>-Dox**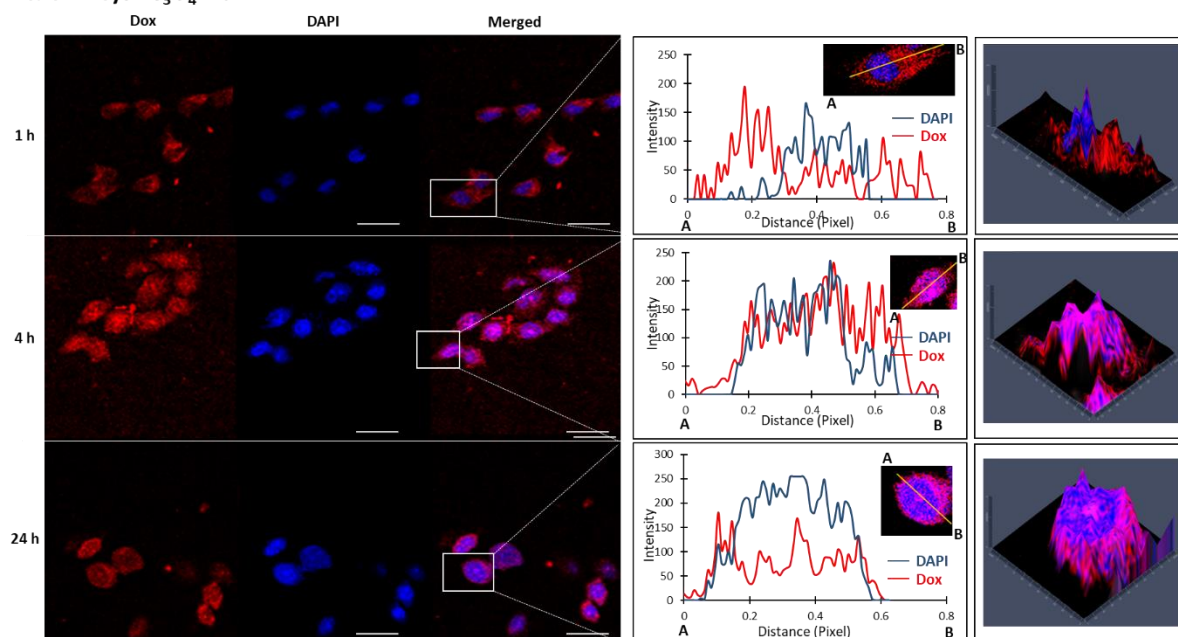

**Figure S1.** Confocal microscope images of HeLa cells incubated with (A) free Dox (B) CNT-Dox and (C) CNT-Cys-Fe<sub>3</sub>O<sub>4</sub>-Dox for 1 h, 4 h and 24 h. The nuclei were stained with DAPI. The nuclear co-localization of Dox and DAPI were confirmed by the pixel intensity profiles of the fluorescent signals. Pseudo 3D images of the respective merged images is displayed in the right panel. Scale Bar: 25  $\mu\text{m}$ .

## 2. Cellular morphological alterations due to oxidized CNT

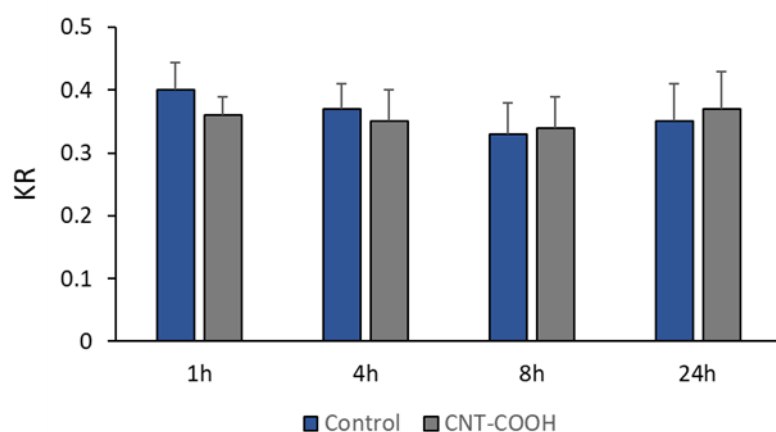

**Figure S2.** Cellular morphological alterations in KR on exposure to CNT-COOH (8.2  $\mu\text{g/ml}$ ).
